# Supplementary material
Source: PubMed Central journal article supplement (PMC7977977)
Supplement: ryct200112suppa1.pdf [file ryct200112suppa1.pdf]

**Table E1. Fields from Provider Utilization and Payment Data Physician and Other Supplier Public Use Files (POSPUF) Used in the Study**

| POSPUF Database Field        | Explanation                                     |
|------------------------------|-------------------------------------------------|
| NPI                          | National Provider Identifier                    |
| NPPES_PROVIDER_GENDER        | Provider Gender                                 |
| NPPES_ENTITY_CODE            | Individual or Organization                      |
| NPPES_PROVIDER_STATE         | State Where the Provider is Located             |
| PROVIDER_TYPE                | Provider Specialty (eg, Radiology, Cardiology)  |
| PLACE_OF_SERVICE             | Facility or non-Facility (eg, Hospital, Office) |
| HCPCS_CODE                   | Healthcare Common Procedure Coding System       |
| LINE_SRVC_CNT                | Number of Services Provided                     |
| AVERAGE_MEDICARE_ALLOWED_AMT | Average Medicare Allowed Amount for the Service |

**Table E2. Healthcare Common Procedure Coding System (HCPCS) Codes Used to Identify Cardiovascular MRI**

| HCPCS Code | Explanation                                                                                                                                                              |
|------------|--------------------------------------------------------------------------------------------------------------------------------------------------------------------------|
| 75557      | Cardiac magnetic resonance imaging for morphology and function without contrast material                                                                                 |
| 75559      | Cardiac magnetic resonance imaging for morphology and function without contrast material; with stress imaging                                                            |
| 75561      | Cardiac magnetic resonance imaging for morphology and function without contrast material(s) followed by contrast material(s) and further sequences                       |
| 75563      | Cardiac magnetic resonance imaging for morphology and function without contrast material(s), followed by contrast material(s) and further sequences; with stress imaging |
| +75565     | Cardiac magnetic resonance imaging for velocity flow mapping; add on code                                                                                                |

**Table E3. Healthcare Common Procedure Coding System (HCPCS) Codes Used to Identify Cardiovascular CT**

| HCPCS Code | Explanation                                                                                                                                                                                                                                                                                            |
|------------|--------------------------------------------------------------------------------------------------------------------------------------------------------------------------------------------------------------------------------------------------------------------------------------------------------|
| 75571      | Computed tomography, heart, without contrast material, with quantitative evaluation of coronary calcium                                                                                                                                                                                                |
| 75572      | Computed tomography, heart, with contrast material, for evaluation of cardiac structure and morphology (including 3D image postprocessing, assessment of cardiac function, and evaluation of venous structures, if performed)                                                                          |
| 75573      | Computed tomography, heart, with contrast material, for evaluation of cardiac structure and morphology in the setting of congenital heart disease (including 3D image postprocessing, assessment of LV cardiac function, RV structure and function, and evaluation of venous structures, if performed) |
| 75574      | Computed tomographic angiography, heart, coronary arteries and bypass grafts (when present), with contrast material, including 3D image postprocessing (including evaluation of cardiac structure and morphology, assessment of cardiac function, and evaluation of venous structures, if performed)   |

**Table E4. Cardiovascular MRI Hospital Outpatient Prospective Payment System (HOPPS) Yearly Percentage Technical Payment Change, 2017–2020**

|      | MRI of the heart without contrast material (75557) | MRI of the heart with stress imaging without contrast material (75559) | MRI of the heart before and after contrast material (75561) | MRI of the heart with stress imaging without contrast material (75563) |
|------|----------------------------------------------------|------------------------------------------------------------------------|-------------------------------------------------------------|------------------------------------------------------------------------|
| 2017 | -17.4%                                             | -48.8%                                                                 | -6.2%                                                       | -40.8%                                                                 |
| 2018 | 8.6%                                               | 8.6%                                                                   | 7.0%                                                        | 3.8%                                                                   |
| 2019 | -6.0%                                              | 102.9%                                                                 | -15.4%                                                      | 1.5%                                                                   |
| 2020 | 1.1%                                               | -3.2%                                                                  | -1.1%                                                       | -1.6%                                                                  |

**Table E5. Cardiovascular CT Hospital Outpatient Prospective Payment System (HOPPS) Yearly Percentage Technical Payment Change, 2017–2020**

|      | CT examination of heart with evaluation of blood vessel calcium (75571) | CT examination of heart structure with contrast material (75572) | CT examination of heart with contrast material in the setting of congenital heart disease (75573) | CT examination of heart blood vessels and grafts with contrast material (75574) |
|------|-------------------------------------------------------------------------|------------------------------------------------------------------|---------------------------------------------------------------------------------------------------|---------------------------------------------------------------------------------|
| 2017 | 371.3%                                                                  | 11.9%                                                            | 11.9%                                                                                             | 11.9%                                                                           |
| 2018 | 3.8%                                                                    | -4.6%                                                            | -4.6%                                                                                             | -4.6%                                                                           |
| 2019 | 0.3%                                                                    | -20.2%                                                           | -20.2%                                                                                            | -20.2%                                                                          |
| 2020 | 30.5%                                                                   | -9.7%                                                            | -9.7%                                                                                             | -9.7%                                                                           |
